# Supplementary material
Source: MDPI journal article supplement (https://www.mdpi.com/2071-1050/12/11/4789)
Supplement: s1 [file s1]

Supplementary materials for the paper: Sustainability-811610

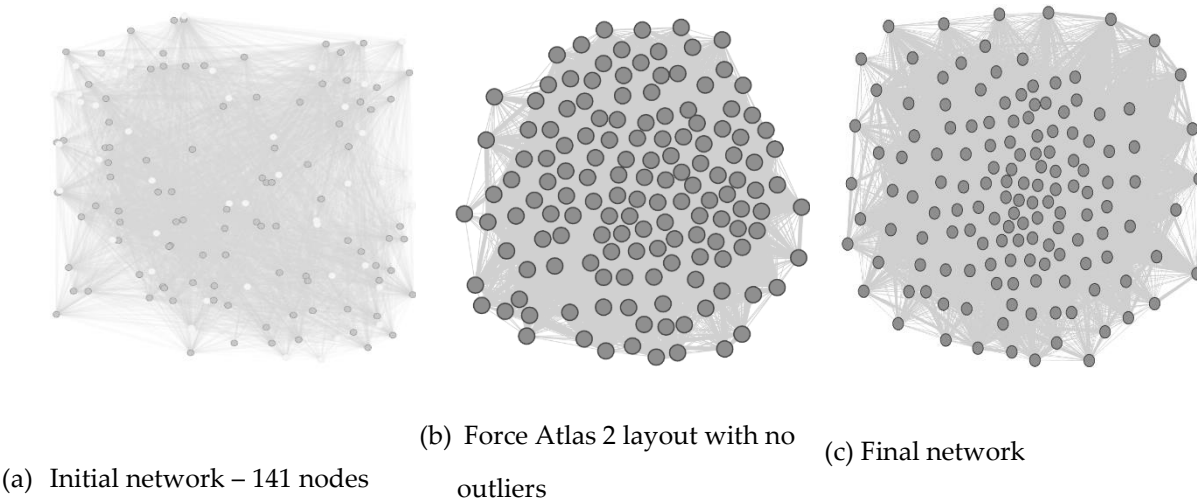

Figure S1. Stages in RFPN analysis visualization using Gephi

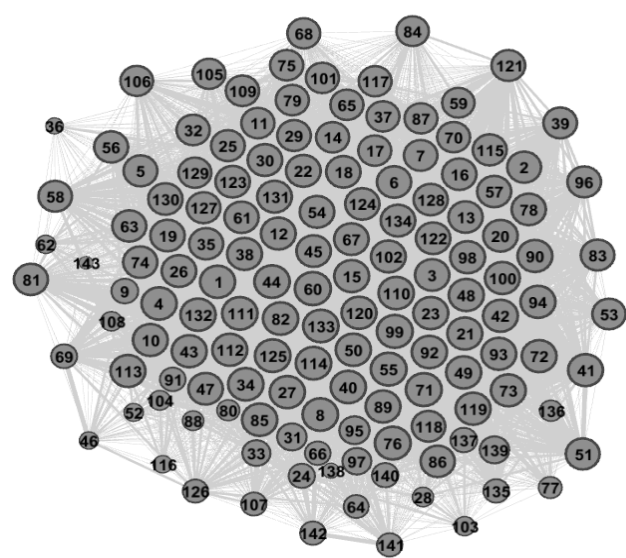

Cluster 1: Vehicle Routing/ Inventory  
Management

Cluster 2: Scheduling

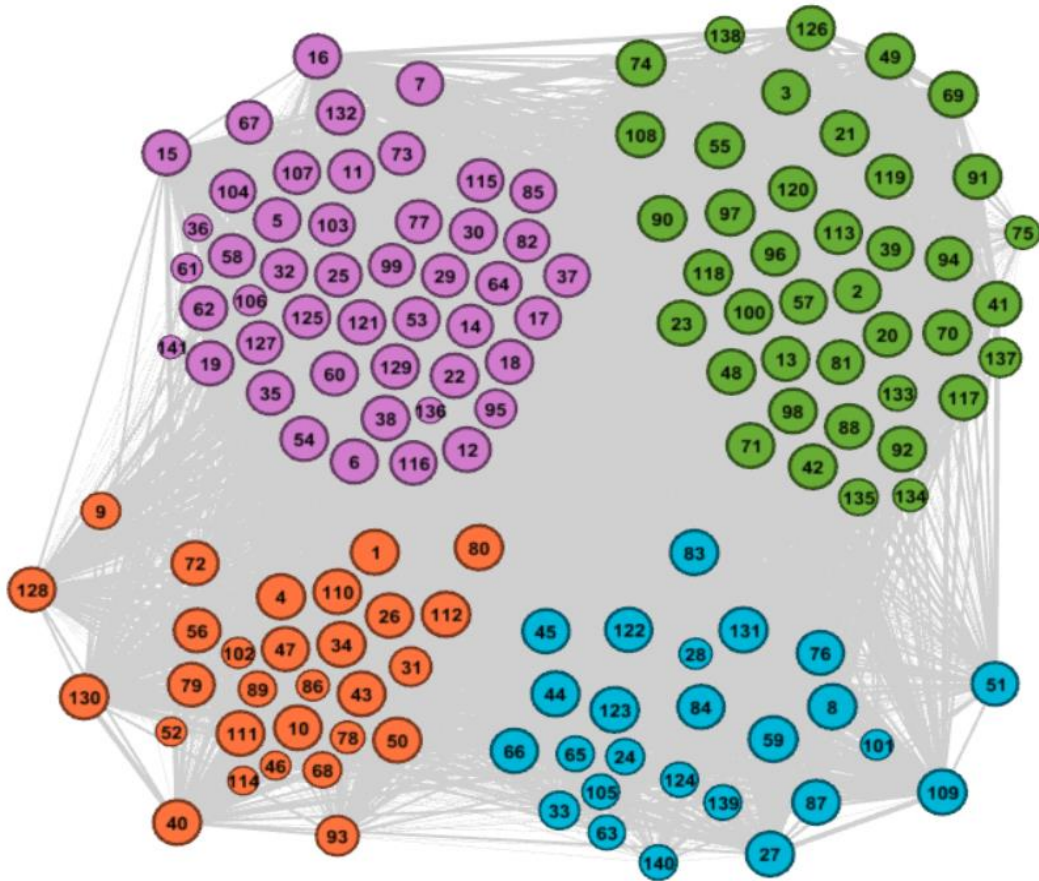

Cluster 4: Warehousing and Distribution

Cluster 3: Logistics

**Figure 3.** Clustered RFPN with node size proportional to eigenvector centrality.

**Table S1.** Publication frequency.

| Year | Frequency | Year | Frequency |
|------|-----------|------|-----------|
| 2018 | 13        | 2007 | 1         |
| 2017 | 15        | 2006 | 4         |
| 2016 | 23        | 2005 | 2         |
| 2015 | 13        | 2004 | 2         |
| 2014 | 13        | 2003 | 1         |
| 2013 | 12        | 2002 | 0         |
| 2012 | 5         | 2001 | 0         |
| 2011 | 9         | 2000 | 1         |
| 2010 | 16        | 1999 | 0         |
| 2009 | 8         | 1997 | 1         |
| 2008 | 5         |      |           |

**Table 2.** Number of papers published for the top 10 countries by year.

| Country     | Year |     |     |     |     |     |     |     |     |     |     |     |     |     |     |     |     | Total |
|-------------|------|-----|-----|-----|-----|-----|-----|-----|-----|-----|-----|-----|-----|-----|-----|-----|-----|-------|
|             | '00  | '03 | '04 | '05 | '06 | '07 | '08 | '09 | '10 | '11 | '12 | '13 | '14 | '15 | '16 | '17 | '18 |       |
| Iran        |      |     |     |     |     |     |     |     | 4   | 5   |     | 5   | 16  | 14  | 15  | 6   | 15  | 80    |
| USA         | 1    |     |     |     | 3   |     | 5   | 4   | 7   | 5   | 2   | 7   | 7   | 10  | 7   | 5   | 7   | 70    |
| Germany     |      |     |     |     |     |     |     |     | 12  | 2   |     | 3   |     | 5   |     | 6   | 6   | 34    |
| Canada      |      |     | 2   |     |     |     |     | 4   | 1   | 5   |     |     |     |     | 5   | 10  | 3   | 30    |
| China       |      | 2   |     |     |     |     |     | 8   | 2   |     | 4   | 3   |     | 1   |     | 2   | 4   | 26    |
| France      |      |     |     |     |     |     |     |     |     | 6   | 1   | 3   |     | 1   | 8   | 5   |     | 24    |
| Taiwan      |      |     |     |     |     | 2   |     |     | 2   |     | 1   | 2   | 3   |     | 10  |     |     | 20    |
| Brazil      |      |     |     |     |     |     |     |     |     |     |     | 3   | 6   |     | 6   |     |     | 15    |
| Argentina   |      |     |     |     |     |     |     |     |     | 3   |     | 2   | 2   | 5   |     |     |     | 12    |
| Netherlands |      |     |     |     |     | 2   |     |     |     | 2   |     |     | 2   | 2   | 2   | 1   |     | 11    |

**Table 3.** Top 10 articles in RFPN clusters based on eigenvector centrality.

| Rank | Cluster 1: Vehicle Routing / Inventory Management |          | Cluster 2: Scheduling              |          | Cluster 3: Logistics                   |          | Cluster 4: Warehousing and Distribution          |          |
|------|---------------------------------------------------|----------|------------------------------------|----------|----------------------------------------|----------|--------------------------------------------------|----------|
|      | Article                                           | EVC*     | Article                            | EVC      | Article                                | EVC      | Article                                          | EVC      |
| 1    | Dondo and Cerdá (2014)                            | 0.95844  | Boloori Arabani and Zandieh (2011) | 0.993087 | Nasiri <i>et al.</i> (2018)            | 1        | Bellanger and Wilbaut (2013)                     | 0.981028 |
| 2    | Yin and Chuang (2016)                             | 0.955034 | Soltani and Sadjadi (2010)         | 0.993087 | Küçükoğlu and Öztürk (2017)            | 0.982911 | Konur and Golias (2013)                          | 0.974504 |
| 3    | Nassief and As'ad (2016)                          | 0.953101 | Tavana <i>et al.</i> (2017)        | 0.991169 | Dondo and Cerdá (2011)                 | 0.980311 | Maknoon, Soumis and Baptiste (2016)              | 0.974504 |
| 4    | Dondo and Cerdá (2013)                            | 0.948696 | Boloori Arabani and Ghomi (2011)   | 0.991169 | McWilliams (2009)                      | 0.978139 | Rahmanzadeh Tootkaleh and Sheikh Sajadieh (2016) | 0.970738 |
| 5    | Liao and Shih (2010)                              | 0.948696 | Dondo and Cerdá (2015)             | 0.971574 | Hosseini and Karimi (2014)             | 0.977161 | Cóccola and Dondo (2015)                         | 0.969589 |
| 6    | Zenker and Boysen (2018)                          | 0.945831 | Larbi <i>et al.</i> (2011)         | 0.971221 | Ting and Weng (2003)                   | 0.976237 | Agustina and Piplani (2014)                      | 0.969589 |
| 7    | Stephan and Boysen (2011)                         | 0.945831 | Amini and Omidvar (2014)           | 0.964026 | Vis and Roodbergen (2008)              | 0.97081  | Maknoon and Baptiste (2009)                      | 0.965956 |
| 8    | Keshtzari and Mehdizadeh (2016)                   | 0.945165 | Ye <i>et al.</i> (2018)            | 0.961921 | Yang and Cheng, (2010)                 | 0.965429 | Kargari Esfand Abad <i>et al.</i> (2018)         | 0.964417 |
| 9    | Mousavi and Jolai (2013)                          | 0.938597 | Van Belle <i>et al.</i> (2013)     | 0.961445 | Soto Zuluaga and Colomé Perales (2017) | 0.956916 | Santos and da Cunha (2013)                       | 0.960967 |
| 10   | Wang <i>et al.</i> (2017)                         | 0.938098 | Molavi and Sajadieh (2018)         | 0.96135  | Schwerdfeger and Briskorn (2018)       | 0.941882 | Gümüş and Bookbinder (2004)                      | 0.960148 |

## Appendix S1. List of papers reviewed with the relevant ID

1. Kargari Esfand Abad, Vahdani, B., Sharifi, M., and Etebari, F. (2018) A bi-objective model for pickup and delivery pollution-routing problem with integration and consolidation shipments in cross-docking system, *Journal of Cleaner Production*, 193, 784–801.
2. Amini, A. and Tavakkoli-Moghaddam, R. (2016) A bi-objective truck scheduling problem in a cross-docking center with probability of breakdown for trucks, *Computers & Industrial Engineering*, 96, 180–191.
3. Alpan, G., Larbi, R. and Penz, B. (2011) A bounded dynamic programming approach to schedule operations in a cross docking platform, *Computers & Industrial Engineering*, 60(3), 385–396.
4. C  cola, M., M  ndez, C. A. and Dondo, R. G. (2015) A branch-and-price approach to evaluate the role of cross-docking operations in consolidated supply chains, *Computers & Chemical Engineering*, 80, 15–29.
5. Nassief, W., Contreras, I. and Jaumard, B. (2018) A comparison of formulations and relaxations for cross-dock door assignment problems, *Computers & Operations Research*, 94, 76–88.
6. Khalili-Damghani, K., Tavana, M., Santos-Arteaga, F. J., and Ghanbarzad-Dashti, M. (2017) A customized genetic algorithm for solving multi-period cross-dock truck scheduling problems, *Measurement: Journal of the International Measurement Confederation*, 108, 101–118.
7. Oh, Y., Hwang, H., Cha, C. N., and Lee, S. (2006) A dock-door assignment problem for the Korean mail distribution center, *Computers & Industrial Engineering*, 51(2), 288–296.
8. McWilliams, D. L. (2009) A dynamic load-balancing scheme for the parcel hub-scheduling problem, *Computers & Industrial Engineering*, 57(3), 958–962.
9. Mousavi, S. M. and Tavakkoli-Moghaddam, R. (2013) A hybrid simulated annealing algorithm for location and routing scheduling problems with cross-docking in the supply chain, *Journal of Manufacturing Systems. The Society of Manufacturing Engineers*, 32(2), 335–347.
10. Hasani Goodarzi, A. and Zegordi, S. H. (2016) A location-routing problem for cross-docking networks: A biogeography-based optimization algorithm, *Computers & Industrial Engineering*, 102, 132–146.
11. Grangier, P., Gendreau, M., Lehu  de, F., and Tousseau, L. M. (2017) A matheuristic based on large neighborhood search for the vehicle routing problem with cross-docking, *Computers & Operations Research*, 84, 116–126.
12. Nassief, W., Contreras, I. and As  ad, R. (2016) A mixed-integer programming formulation and Lagrangean relaxation for the cross-dock door assignment problem, *International Journal of Production Research*, 54(2), 494–508.
13. Yazdani, M., Naderi, B. and Mousakhani, M. (2015) A model and metaheuristic for truck scheduling in multi-door cross-dock problems, *Intelligent Automation & Soft Computing*, 21(4), 633–644.
14. Baniamerian, A., Bashiri, M. and Zabihi, F. (2018) A modified variable neighborhood search hybridized with genetic algorithm for vehicle routing problems with cross-docking, *Electronic Notes in Discrete Mathematics*, 66, 143–150.
15. Dondo, R. and Cerd  , J. (2014) A monolithic approach to vehicle routing and operations scheduling of a cross-dock system with multiple dock doors, *Computers & Chemical Engineering*, 63, 184–205.
16. Mohtashami, A. (2015a) A novel dynamic genetic algorithm-based method for vehicle scheduling in cross docking systems with frequent unloading operation, *Computers & Industrial Engineering*, 90, 221–240.
17. Mokhtarinejad, M., Ahmadi, A., Karimi, B., and Rahmati, S. H. A. (2015) A novel learning based approach for a new integrated location-routing and scheduling problem within cross-docking considering direct shipment, *Applied Soft Computing*, 34, 274–285.

18. Mohtashami, A., Tavana, M., Santos-Arteage, F. J., and Fallahian-Najafabadi, A. (2015) A novel multi-objective meta-heuristic model for solving cross-docking scheduling problems, *Applied Soft Computing*, 31, 30–47.
19. Mousavi, S. M., Tavakkoli-Moghaddam, R. and Jolai, F. (2013) A possibilistic programming approach for the location problem of multiple cross-docks and vehicle routing scheduling under uncertainty, *Engineering Optimization*, 45(10), 1223–1249.
20. Agustina, D., Lee, C. K. M. and Piplani, R. (2010) A review: Mathematical models for cross docking planning, *International Journal of Engineering Business Management*, 2(2), 47-54.
21. Hermel, D., hasheminia, H., Adler, N., and Fry, M. J. (2016) A solution framework for the multi-mode resource-constrained cross-dock scheduling problem, *Omega*, 59(Part B), 157–170.
22. Dondo, R. and Cerdá, J. (2013) A sweep-heuristic based formulation for the vehicle routing problem with cross-docking, *Computers & Chemical Engineering*, 48, 293–311.
23. Van Belle, J. *et al.* (2013) A Tabu search approach to the truck scheduling problem with multiple docks and time windows, *Computers & Industrial Engineering*, 66(4), 818–826.
24. Salema, M. I., Póvoa, A. P. B. and Novais, A. Q. (2006) A warehouse-based design model for reverse logistics, *Journal of the Operational Research Society*, 57(6), 615–629.
25. Yin, P.-Y. and Chuang, Y.-L. (2016) Adaptive memory artificial bee colony algorithm for green vehicle routing with cross-docking, *Applied Mathematical Modelling*, 40(21–22), 9302–9315.
26. Nikolopoulou, A. I., Repoussis, P. P., Tarantilis, C. D., and Zachariadis, E. E. (2016) Adaptive memory programming for the many-to-many vehicle routing problem with cross-docking, *Operational Research*, 19(1), 1–38.
27. Yang, K. K., Balakrishnan, J. and Cheng, C. H. (2010) An analysis of factors affecting cross docking operations, *Journal of Business Logistics*, 31(1), 121–148.
28. Lai, K., Cheng, T. C. E. and Yeung, A. C. L. (2004) An empirical taxonomy for logistics service providers, *Maritime Economics & Logistics*, 6(3), 199–219.
29. Ross, A. and Jayaraman, V. (2008) An evaluation of new heuristics for the location of cross-docks distribution centers in supply chain network design, *Computers & Industrial Engineering*, 55(1), 64–79.
30. Keshtzari, M., Naderi, B. and Mehdizadeh, E. (2016) An improved mathematical model and a hybrid metaheuristic for truck scheduling in cross-dock problems, *Computers & Industrial Engineering*, 91, 197–204.
31. Maknoon, M. Y., Soumis, F. and Baptiste, P. (2017) An integer programming approach to scheduling the transshipment of products at cross-docks in less-than-truckload industries, *Computers & Operations Research*, 82, 167–179.
32. Galbreth, M. R., Hill, J. A. and Handley, S. (2008) An investigation of the value of cross-docking for supply chain management, *Journal of Business Logistics*, 29(1), 225–239.
33. Schöneberg, T., Koberstein, A. and Suhl, L. (2010) An optimization model for automated selection of economic and ecologic delivery profiles in area forwarding based inbound logistics networks, *Flexible Services and Manufacturing Journal*, 22(3–4), 214–235.
34. Konur, D. and Golias, M. M. (2013a) Analysis of different approaches to cross-dock truck scheduling with truck arrival time uncertainty, *Computers & Industrial Engineering*, 65(4), 663–672.
35. Musa, R., Arnaout, J.-P. and Jung, H. (2010) Ant colony optimization algorithm to solve for the transportation problem of cross-docking network, *Computers & Industrial Engineering*, 59(1), 85–92.
36. Maghsoudlou, H., Rashidi Kahag, M., Akhavan Niaki, S. T., and Pourvaziri, H. (2016) Bi-objective optimization of a three-echelon multi-server supply-chain problem in congested systems: Modeling and solution, *Computers and Industrial Engineering*, 99, 41–62.
37. Ahkamiraad, A. and Wang, Y. (2018) Capacitated and multiple cross-docked vehicle routing problem with pickup, delivery, and time windows, *Computers & Industrial Engineering*, 119(17), 76–84.

38. Yin, P.-Y., Lyu, S.-R. and Chuang, Y.-L. (2016) Cooperative coevolutionary approach for integrated vehicle routing and scheduling using cross-dock buffering, *Engineering Applications of Artificial Intelligence*, 52, 40–53.
39. Konur, D. and Golias, M. M. (2013b) Cost-stable truck scheduling at a cross-dock facility with unknown truck arrivals: A meta-heuristic approach, *Transportation Research Part E: Logistics and Transportation Review*, 49(1), 71–91.
40. Rahmanzadeh Tootkaleh, S., Fatemi Ghomi, S. M. T. and Sheikh Sajadieh, M. (2016) Cross dock scheduling with fixed outbound trucks departure times under substitution condition, *Computers & Industrial Engineering*, 92, 50–56.
41. Boysen, N. and Fliedner, M. (2010) Cross dock scheduling: Classification, literature review and research agenda, *Omega*, 38(6), 413–422.
42. Choy, K. L., Chow, H. K. H., Poon, T. C., and Ho, G. T. S. (2012) Cross-dock job assignment problem in space-constrained industrial logistics distribution hubs with a single docking zone, *International Journal of Production Research*, 50(9), 2439–2450.
43. Gümüş, M. and Bookbinder, J. H. (2004) Cross-docking and its implications in location-distribution systems, *Journal of Business Logistics*, 25(2), 199–228.
44. Hosseini, S. D., Akbarpour Shirazi, M. and Karimi, B. (2014) Cross-docking and milk run logistics in a consolidation network: A hybrid of harmony search and simulated annealing approach, *Journal of Manufacturing Systems*, 33(4), 567–577.
45. Barsing, P., Daultani, Y., Vaidya, O. S., and Kumar, S. (2018) Cross-docking centre location in a supply chain network: A social network analysis approach, *Global Business Review*, 19(3\_suppl), S218–S234.
46. Mousavi, S. M. and Vahdani, B. (2016) Cross-docking location selection in distribution systems: A new intuitionistic fuzzy hierarchical decision model, *International Journal of Computational Intelligence Systems*, 9(1), 91–109.
47. Ladier, A.-L. and Alpan, G. (2016a) Cross-docking operations: Current research versus industry practice, *Omega*, 62, 145–162.
48. Ye, Y., Li, J., Li, K., and Fu, H. (2018) Cross-docking truck scheduling with product unloading/loading constraints based on an improved particle swarm optimisation algorithm, *International Journal of Production Research*, 56(16), 5365–5385.
49. Amini, A., Tavakkoli-Moghaddam, R. and Omidvar, A. (2014) Cross-docking truck scheduling with the arrival times for inbound trucks and the learning effect for unloading/loading processes, *Production and Manufacturing Research*, 2(1), 784–804.
50. Maknoon, M. Y. and Baptiste, P. (2009) Cross-docking: Increasing platform efficiency by sequencing incoming and outgoing semi-trailers, *International Journal of Logistics Research and Applications*, 12(4), 249–261.
51. Van Belle, J., Valckenaers, P. and Cattryse, D. (2012) Cross-docking: State of the art, *Omega*, 40(6), 827–846.
52. Martins, S., Amorim, P. and Almada-Lobo, B. (2017) Delivery mode planning for distribution to brick-and-mortar retail stores: Discussion and literature review, *Flexible Services and Manufacturing Journal*, 1–28.
53. Allen, W. J., Balias, T. E., Mukherjee, S., Brozell, S. R., Moustakas, D. T., et al. (2015) DOCK 6: Impact of new features and current docking performance, *Journal of Computational Chemistry*, 36(15), 1132–1156.
54. Zenker, M. and Boysen, N. (2018) Dock sharing in cross-docking facilities of the postal service industry, *Journal of the Operational Research Society*, 69(7), 1061–1076.
55. Tavana, M., Khalili-Damghani, K., Santos-Arteage, F. J., and Zandi, M. H. (2017) Drone shipping versus truck delivery in a cross-docking system with multiple fleets and products, *Expert Systems with Applications*, 72, 93–107.
56. Apte, U. M. and Viswanathan, S. (2000) Effective cross docking for improving distribution efficiencies, *International Journal of Logistics Research and Applications*, 3(3), 291–302.

57. Alpan, G., Jolani, A. L., Larbi, R., and Penz, B. (2011) Heuristic solutions for transshipment problems in a multiple door cross docking warehouse, *Computers & Industrial Engineering*, 61(2), 402–408.
58. Waller, M. A., Cassady, C. R. and Ozment, J. (2006) Impact of cross-docking on inventory in a decentralized retail supply chain, *Transportation Research Part E: Logistics and Transportation Review*, 42(5), 359–382.
59. Nasiri, M. M., Rahbari, A., Werner, F., and Karimi, R. (2018) Incorporating supplier selection and order allocation into the vehicle routing and multi-cross-dock scheduling problem, *International Journal of Production Research*, 56(19), 6527–6552.
60. Enderer, F., Contardo, C. and Contreras, I. (2017) Integrating dock-door assignment and vehicle routing with cross-docking, *Computers & Operations Research*, 88, 30–43.
61. Shaelaie, M.-H., Ranjbar, M. and Jamili, N. (2018) Integration of parts transportation without cross docking in a supply chain, *Computers & Industrial Engineering*, 118, 67–79.
62. Khorasani, S. T., Keshtzari, M., Isalm, M., and Feizi, R. (2018) Intravenous fluid delivery time improvement: Application of cross-docking system, *International Journal of Health Care Quality Assurance*, 31(8), 1070–1081.
63. Kinneer, E. (1997) Is there any magic in cross-docking?, *Supply Chain Management: An International Journal*, 2(2), 49–52.
64. Morais, V. W. C., Mateus, G. R. and Noronha, T. F. (2014) Iterated local search heuristics for the vehicle routing problem with cross-docking, *Expert Systems with Applications*, 41(16), 7495–7506.
65. Schwerdfeger, S., Boysen, N. and Briskorn, D. (2018) Just-in-time logistics for far-distant suppliers: Scheduling truck departures from an intermediate cross-docking terminal, *OR Spectrum*, 40(1), 1–21.
66. Buijs, P., Danhof, H. W. and Wortmann, J. H. C. (2016) Just-in-Time retail distribution: A systems perspective on cross-docking, *Journal of Business Logistics*, 37(3), 213–230.
67. Vis, I. F. A. and Roodbergen, K. J. (2011) Layout and control policies for cross docking operations, *Computers & Industrial Engineering*, 61(4), 911–919.
68. Mousavi, S. M., Vahdani, B., Tavakkoli-Moghaddam, R., and Hasemi, H. (2014) Location of cross-docking centers and vehicle routing scheduling under uncertainty: A fuzzy possibilistic-stochastic programming model, *Applied Mathematical Modelling*, 38(7–8), 2249–2264.
69. Boloori Arabani, A. R., Fatemi Ghomi, S. M. T. and Zandieh, M. (2011) Meta-heuristics implementation for scheduling of trucks in a cross-docking system with temporary storage, *Expert Systems with Applications*, 38(3), 1964–1979.
70. Chen, F. and Song, K. (2009) Minimizing makespan in two-stage hybrid cross docking scheduling problem, *Computers & Operations Research*, 36(6), 2066–2073.
71. Chen, F. and Lee, C.-Y. (2009) Minimizing the makespan in a two-machine cross-docking flow shop problem, *European Journal of Operational Research*, 193(1), 59–72.
72. Nikolopoulou, A. I., Repoussis, P. p., Tarantilis, C. D., and Zachariadis, E. E. (2017) Moving products between location pairs: Cross-docking versus direct-shipping, *European Journal of Operational Research*, 256(3), 803–819.
73. Shi, W., Liu, Z., Shang, J., and Cui, Y. (2013) Multi-criteria robust design of a JIT-based cross-docking distribution center for an auto parts supply chain, *European Journal of Operational Research*, 229(3), 695–706.
74. Boloori Arabani, A., Zandieh, M. and Ghomi, S. M. T. F. (2011) Multi-objective genetic-based algorithms for a cross-docking scheduling problem, *Applied Soft Computing*, 11(8), 4954–4970.
75. Madani-Isfahani, M., Tavakkoli-Moghaddam, R. and Naderi, B. (2014) Multiple cross-docks scheduling using two meta-heuristic algorithms, *Computers & Industrial Engineering*, 74(1), 129–138.



76. Tarhini, A. A., Yunis, M. M. and Chamseddine, M. (2016) Natural optimization algorithms for the cross-dock door assignment problem, *IEEE Transactions on Intelligent Transportation Systems*, 17(8), 2324–2333.
77. Yu, V. F., Jewpanya, P. and Redi, A. A. N. P. (2016) Open vehicle routing problem with cross-docking, *Computers & Industrial Engineering*, 94, 6–17.
78. Clausen, U., Diekmann, D., Pötting, M., and Schumacher, C. (2017) Operating parcel transshipment terminals: A combined simulation and optimization approach, *Journal of Simulation*, 11(1), 2–10.
79. Motaghedi-Larijani, A. and Aminnayeri, M. (2017) Optimizing the admission time of outbound trucks entering a cross-dock with uniform arrival time by considering a queuing model, *Engineering Optimization*, 49(3), 466–480.
80. Maknoon, M. Y., Soumis, F. and Baptiste, P. (2016) Optimizing transshipment workloads in less-than-truckload cross-docks, *International Journal of Production Economics*, 179, 90–100.
81. Kuo, Y. (2013) Optimizing truck sequencing and truck dock assignment in a cross docking system, *Expert Systems with Applications*, 40(14), 5532–5541.
82. Yu, V. F., Jewpanya, P. and Kachitvichyanukul, V. (2016) Particle swarm optimization for the multi-period cross-docking distribution problem with time windows, *International Journal of Production Research*, 54(2), 509–525.
83. Vis, I. F. A. and Roodbergen, K. J. (2008) Positioning of goods in a cross-docking environment, *Computers & Industrial Engineering*, 54(3), 677–689.
84. Yan, H. and Tang, S. (2009) Pre-distribution and post-distribution cross-docking operations, *Transportation Research Part E: Logistics and Transportation Review*, 45(6), 843–859.
85. Tang, S. L. and Yan, H. (2010) Pre-distribution vs. post-distribution for cross-docking with transshipments, *Omega*, 38(3–4), 192–202.
86. Akkerman, R., Farahani, P. and Grunow, M. (2010) Quality, safety and sustainability in food distribution: a review of quantitative operations management approaches and challenges, *OR Spectrum*, 32(4), 863–904.
87. Soto Zuluaga, J. P., Thiell, M. and Colomé Perales, R. (2017) Reverse cross-docking, *Omega*, 66, 48–57.
88. Ladier, A.-L. and Alpan, G. (2016b) Robust cross-dock scheduling with time windows, *Computers & Industrial Engineering*, 99, 16–28.
89. O’Kelly, M. E. (2010) Routing traffic at hub facilities, *Networks and Spatial Economics*, 10(2), 173–191.
90. Larbi, R., Alpan, G., Baptiste, P., and Pena, B. (2011) Scheduling cross docking operations under full, partial and no information on inbound arrivals, *Computers & Operations Research*, 38(6), 889–900.
91. Boysen, N., Flidner, M. and Scholl, A. (2010) Scheduling inbound and outbound trucks at cross docking terminals, *OR Spectrum*, 32(1), 135–161.
92. Sadykov, R. (2012) Scheduling incoming and outgoing trucks at cross docking terminals to minimize the storage cost, *Annals of Operations Research*, 201(1), 423–440.
93. Fanti, M. P., Stecco, G. and Ukovich, W. (2016) Scheduling internal operations in post-distribution cross docking systems, *IEEE Transactions on Automation Science and Engineering*, 13(1), 296–312.
94. Zhang, T., Saharidis, G. K. D., Theofanis, S., and Boile, M. (2010) Scheduling of inbound and outbound trucks at cross-docks, *Transportation Research Record: Journal of the Transportation Research Board*, 2162(1), 9–16.
95. Serrano, C., Delorme, X. and Dolgui, A. (2017) Scheduling of truck arrivals, truck departures and shop-floor operation in a cross-dock platform, based on trucks loading plans, *International Journal of Production Economics*, 194, 102–112.
96. Mohtashami, A. (2015b) Scheduling trucks in cross docking systems with temporary storage and repetitive pattern for shipping trucks, *Applied Soft Computing*, 36, 468–486.

97. Soltani, R. and Sadjadi, S. J. (2010) Scheduling trucks in cross-docking systems: A robust meta-heuristics approach, *Transportation Research Part E: Logistics and Transportation Review*, 46(5), 650–666.
98. Vahdani, B. and Zandieh, M. (2010) Scheduling trucks in cross-docking systems: Robust meta-heuristics, *Computers & Industrial Engineering*, 58(1), 12–24.
99. Cattani, K. D., Souza, G. C. and Ye, S. (2014) Shelf loathing: Cross docking at an online retailer, *Production and Operations Management*, 23(5), 893–906.
100. Liao, T. W., Egbelu, P. J. and Chang, P. C. (2013) Simultaneous dock assignment and sequencing of inbound trucks under a fixed outbound truck schedule in multi-door cross docking operations, *International Journal of Production Economics*, 141(1), 212–229.
101. Liu, X., McKinnon, A. C., Grant, D. B., and Feng, Y. (2010) Sources of competitiveness for logistics service providers: A UK industry perspective, *Logistics Research*, 2(1), 23–32.
102. Anken, N., Gagliardi, J. P., Renaud, J., and Ruiz, A. (2011) Space allocation and aisle positioning for an industrial pick-to-belt system, *Journal of the Operational Research Society*, 62(1), 38–49.
103. Zaerpour, N., Yu, Y. and de Koster, R. B. M. (2015) Storing fresh produce for fast retrieval in an automated compact cross-dock system, *Production and Operations Management*, 24(8), 1266–1284.
104. Buijs, P., Vis, I. F. A. and Carlo, H. J. (2014) Synchronization in cross-docking networks: A research classification and framework, *European Journal of Operational Research*, 239(3), 593–608.
105. Boysen, N., Emde, S., Stephan, K., and Weiß, M. (2015) Synchronization in hub terminals with the circular arrangement problem, *Naval Research Logistics*, 62(6), 454–469.
106. chain networks, *International Journal of Production Research*, 54(9), 2585–2599.
107. Kreng, V. B. and Chen, F.-T. (2008) The benefits of a cross-docking delivery strategy: A supply chain collaboration approach, *Production Planning & Control*, 19(3), 229–241.
108. Dondo, R. and Cerdá, J. (2015) The heterogeneous vehicle routing and truck scheduling problem in a multi-door cross-dock system, *Computers & Chemical Engineering*, 76, 42–62.
109. Dondo, R., Méndez, C. A. and Cerdá, J. (2011) The multi-echelon vehicle routing problem with cross docking in supply chain management, *Computers & Chemical Engineering*, 35(12), 3002–3024.
110. Santos, F. A., Mateus, G. R. and da Cunha, A. S. (2013) The pickup and delivery problem with cross-docking, *Computers & Operations Research*, 40(4), 1085–1093.
111. Vogt, J. J. (2010) The successful cross-dock based supply chain, *Journal of Business Logistics*, 31(1), 99–119.
112. Bellanger, A., Hanafi, S. and Wilbaut, C. (2013) Three-stage hybrid-flowshop model for cross-docking, *Computers and Operations Research*, 40(4), 1109–1121.
113. Cota, P. M., Gimenez, B. M. r., Araujo, D. P. M., Nogueira, T. H., de Souza, M. C., and Ravetti, M. G. (2016) Time-indexed formulation and polynomial time heuristic for a multi-dock truck scheduling problem in a cross-docking centre, *Computers & Industrial Engineering*, 95, 135–143.
114. Davarzani, H. and Norrman, A. (2015) Toward a relevant agenda for warehousing research: Literature review and practitioners' input, *Logistics Research*, 8(1), p. 1.
115. Miao, Z., Yang, F., Fu, K., and Xu, D. (2012) Transshipment service through crossdocks with both soft and hard time windows, *Annals of Operations Research*, 192(1), 21–47.
116. Miao, Z., Lim, A. and Ma, H. (2009) Truck dock assignment problem with operational time constraint within crossdocks, *European Journal of Operational Research*, 192(1), 105–115.
117. Boysen, N. (2010) Truck scheduling at zero-inventory cross docking terminals, *Computers & Operations Research*, 37(1), 32–41.
118. Molavi, D., Shahmardan, A. and Sajadieh, M. S. (2018) Truck scheduling in a cross docking systems with fixed due dates and shipment sorting, *Computers & Industrial Engineering*, 117, 29–40.

119. Wisittipanich, W. and Hengmeechai, P. (2017) Truck scheduling in multi-door cross docking terminal by modified particle swarm optimization, *Computers & Industrial Engineering*, 113, 793–802.
120. Liao, T. W., Egbelu, P. J. and Chang, P. C. (2012) Two hybrid differential evolution algorithms for optimal inbound and outbound truck sequencing in cross docking operations, *Applied Soft Computing*, 12(11), 3683–3697.
121. Wang, J., Jagannathan, A. K., Zuo, X., Murray, C. C. (2017) Two-layer simulated annealing and Tabu search heuristics for a vehicle routing problem with cross docks and split deliveries, *Computers & Industrial Engineering*, 112, 84–98.
122. Ahmadizar, F., Zeynivand, M. and Arkat, J. (2015) Two-level vehicle routing with cross-docking in a three-echelon supply chain: A genetic algorithm approach, *Applied Mathematical Modelling*, 39(22), 7065–7081.
123. Küçüköğlu, İ. and Öztürk, N. (2017) Two-stage optimisation method for material flow and allocation management in cross-docking networks, *International Journal of Production Research*, 55(2), 410–429.
124. Kellner, F., Otto, A. and Busch, A. (2013) Understanding the robustness of optimal FMCG distribution networks, *Logistics Research*, 6(4), 173–185.
125. Lee, Y. H., Jung, J. W. and Lee, K. M. (2006) Vehicle routing scheduling for cross-docking in the supply chain, *Computers & Industrial Engineering*, 51(2), 247–256.
126. Shahin Moghadam, S., Fatemi Ghomi, S. M. T. and Karimi, B. (2014) Vehicle routing scheduling problem with cross docking and split deliveries, *Computers & Chemical Engineering*, 69, 98–107.
127. Maknoon, Y. and Laporte, G. (2017) Vehicle routing with cross-dock selection, *Computers & Operations Research*, 77, 254–266.
128. Wen, M., Larsen, J., Clausen, J., Cordeau, J. F., and Laporte, G. (2009) Vehicle routing with cross-docking, *Journal of the Operational Research Society*, 60(12), 1708–1718.
129. Liao, C.-J., Lin, Y. and Shih, S. C. (2010) Vehicle routing with cross-docking in the supply chain, *Expert Systems with Applications*, 37(10), 6868–6873.
130. Agustina, D., Lee, C. K. M. and Piplani, R. (2014) Vehicle scheduling and routing at a cross docking center for food supply chains, *International Journal of Production Economics*, 152, 29–41.
131. Ting, C.-J. and Weng, W.-L. (2003) Vehicle scheduling problem at a cross-docking terminal, *Journal of the Chinese Institute of Industrial Engineers*, 20(6), 636–650.
132. Stephan, K. and Boysen, N. (2011) Vis-à-vis vs. mixed dock door assignment: A comparison of different cross dock layouts, *Operations Management Research*, 4(3–4), 150–163.
133. Gelareh, S., Momeni, R., Semet, F., and Goncalves, G. (2016) A branch-and-cut algorithm for the truck dock assignment problem with operational time constraints, *European Journal of Operational Research*, 249(3), 1144–1152.
134. Liao, T. W., Chang, P. C., Kuo, R. J., and Liao, C. J. (2014) A comparison of five hybrid metaheuristic algorithms for unrelated parallel-machine scheduling and inbound trucks sequencing in multi-door cross docking systems, *Applied Soft Computing Journal*, 21, 180–193.
135. Shiguemoto, A. L., Cavalcante Netto, U. S. and Bauab, G. H. S. (2014) An efficient hybrid meta-heuristic for a cross-docking system with temporary storage, *International Journal of Production Research*, 52(4), 1231–1239.
136. Shen, Z.-J. M., Shu, J., Simchi-Levi, D., Teo, C. P., and Zhang, J. (2009) Approximation algorithms for general one-warehouse multi-retailer systems, *Naval Research Logistics*, 56(7), 642–658.
137. Berghman, L. and Leus, R. (2015) Practical solutions for a dock assignment problem with trailer transportation, *European Journal of Operational Research*, 246(3), 787–799.
138. Chiarello, A., Gaudioso, M. and Sammarra, M. (2018) Truck synchronization at single door cross-docking terminals, *OR Spectrum*, 40(2), 395–447.

139. Sung, C. S. and Yang, W. (2008) An exact algorithm for a cross-docking supply chain network design problem, *Journal of the Operational Research Society*, 59(1), 119–136.
140. Sung, C. S. and Song, S. H. (2003) Integrated service network design for a cross-docking supply chain network, *Journal of the Operational Research Society*, 54(12), 1283–1295.
141. Çetinkaya, S., Keskin, B. B. and Üster, H. (2014) Characterization of facility assignment costs for a location-inventory model under truckload distribution, *Journal of the Operational Research Society*, 65(9), 1371–1379.
